# Supplementary material
Source: publisher site journal article supplement (https://www.jstage.jst.go.jp/article/geochemj/47/3/47_2.0252/_supplement/_download/47_2.0252_1.pdf)
Supplement: Supplementary file 1 [file 47_2.0252_1.pdf]

Supplementary Table S1. Analytical results of geological standard glass and ground mass using LA-MC-ICP-MS

| Sample                    | $^{206}\text{Pb}/^{204}\text{Pb}$ Error (2SE) | $^{207}\text{Pb}/^{204}\text{Pb}$ Error (2SE) | $^{208}\text{Pb}/^{204}\text{Pb}$ Error (2SE) | $^{207}\text{Pb}/^{206}\text{Pb}$ Error (2SE) | $^{208}\text{Pb}/^{206}\text{Pb}$ Error (2SE) |       |        |        |        |        |
|---------------------------|-----------------------------------------------|-----------------------------------------------|-----------------------------------------------|-----------------------------------------------|-----------------------------------------------|-------|--------|--------|--------|--------|
| [Solution MC-ICP-MS/TIMS] |                                               |                                               |                                               |                                               |                                               |       |        |        |        |        |
| BCR-2G                    | 18.759                                        | 0.009                                         | 15.629                                        | 0.005                                         | 38.740                                        | 0.021 | 0.833  | 0.0003 | 2.065  | 0.0006 |
| [LA-MC-ICP-MS]            |                                               |                                               |                                               |                                               |                                               |       |        |        |        |        |
| BCR-2G-1                  | 18.773                                        | 0.006                                         | 15.636                                        | 0.007                                         | 38.751                                        | 0.017 | 0.8329 | 0.0003 | 2.0642 | 0.0007 |
| BCR-2G-2                  | 18.772                                        | 0.007                                         | 15.617                                        | 0.007                                         | 38.698                                        | 0.018 | 0.8318 | 0.0003 | 2.0613 | 0.0007 |
| BCR-2G-3                  | 18.758                                        | 0.006                                         | 15.592                                        | 0.007                                         | 38.629                                        | 0.017 | 0.8312 | 0.0002 | 2.0595 | 0.0005 |
| BCR-2G-4                  | 18.765                                        | 0.006                                         | 15.607                                        | 0.008                                         | 38.670                                        | 0.019 | 0.8317 | 0.0003 | 2.0608 | 0.0007 |
| BCR-2G-5                  | 18.776                                        | 0.007                                         | 15.598                                        | 0.008                                         | 38.647                                        | 0.019 | 0.8308 | 0.0002 | 2.0584 | 0.0006 |
| BCR-2G-1                  | 18.766                                        | 0.012                                         | 15.625                                        | 0.010                                         | 38.720                                        | 0.025 | 0.8326 | 0.0001 | 2.0633 | 0.0002 |
| BCR-2G-2                  | 18.772                                        | 0.010                                         | 15.629                                        | 0.009                                         | 38.735                                        | 0.022 | 0.8326 | 0.0001 | 2.0634 | 0.0002 |
| BCR-2G-3                  | 18.774                                        | 0.014                                         | 15.632                                        | 0.011                                         | 38.746                                        | 0.028 | 0.8327 | 0.0001 | 2.0638 | 0.0002 |
| BCR-2G-4                  | 18.761                                        | 0.012                                         | 15.615                                        | 0.011                                         | 38.702                                        | 0.028 | 0.8325 | 0.0001 | 2.0633 | 0.0003 |
| BCR-2G-5                  | 18.793                                        | 0.009                                         | 15.643                                        | 0.008                                         | 38.766                                        | 0.021 | 0.8324 | 0.0001 | 2.0629 | 0.0001 |
| BCR-2G-1                  | 18.746                                        | 0.015                                         | 15.606                                        | 0.010                                         | 38.667                                        | 0.027 | 0.8325 | 0.0001 | 2.0627 | 0.0004 |
| BCR-2G-2                  | 18.768                                        | 0.012                                         | 15.616                                        | 0.008                                         | 38.699                                        | 0.019 | 0.8321 | 0.0002 | 2.0623 | 0.0004 |
| BCR-2G-3                  | 18.734                                        | 0.007                                         | 15.595                                        | 0.006                                         | 38.647                                        | 0.013 | 0.8325 | 0.0001 | 2.0630 | 0.0001 |
| BCR-2G-4                  | 18.730                                        | 0.007                                         | 15.592                                        | 0.005                                         | 38.636                                        | 0.014 | 0.8324 | 0.0001 | 2.0628 | 0.0002 |
| BCR-2G-5                  | 18.741                                        | 0.009                                         | 15.603                                        | 0.006                                         | 38.668                                        | 0.016 | 0.8325 | 0.0001 | 2.0633 | 0.0003 |
| BCR-2G-6                  | 18.749                                        | 0.007                                         | 15.605                                        | 0.006                                         | 38.665                                        | 0.014 | 0.8323 | 0.0001 | 2.0620 | 0.0001 |
| BCR-2G-7                  | 18.760                                        | 0.009                                         | 15.612                                        | 0.009                                         | 38.688                                        | 0.019 | 0.8323 | 0.0001 | 2.0622 | 0.0001 |
| BCR-2G-8                  | 18.765                                        | 0.011                                         | 15.621                                        | 0.009                                         | 38.710                                        | 0.022 | 0.8325 | 0.0001 | 2.0629 | 0.0001 |
| Average*                  | 18.761                                        | 0.032                                         | 15.614                                        | 0.031                                         | 38.691                                        | 0.082 | 0.8322 | 0.0030 | 2.0623 | 0.0011 |
| [Solution MC-ICP-MS/TIMS] |                                               |                                               |                                               |                                               |                                               |       |        |        |        |        |
| JB-2                      | 18.339                                        | 0.011                                         | 15.557                                        | 0.016                                         | 38.260                                        | 0.055 | 0.848  | 0.0004 | 2.087  | 0.0018 |
| [LA-MC-ICP-MS]            |                                               |                                               |                                               |                                               |                                               |       |        |        |        |        |
| JB-2-1                    | 18.334                                        | 0.018                                         | 15.576                                        | 0.014                                         | 38.323                                        | 0.037 | 0.8496 | 0.0001 | 2.0903 | 0.0002 |
| JB-2-2                    | 18.311                                        | 0.034                                         | 15.552                                        | 0.028                                         | 38.281                                        | 0.072 | 0.8493 | 0.0001 | 2.0906 | 0.0003 |
| JB-2-3                    | 18.284                                        | 0.018                                         | 15.535                                        | 0.014                                         | 38.228                                        | 0.037 | 0.8495 | 0.0001 | 2.0904 | 0.0002 |
| JB-2-4                    | 18.334                                        | 0.034                                         | 15.576                                        | 0.028                                         | 38.323                                        | 0.072 | 0.8496 | 0.0001 | 2.0903 | 0.0003 |
| JB-2-5                    | 18.287                                        | 0.018                                         | 15.532                                        | 0.015                                         | 38.220                                        | 0.039 | 0.8494 | 0.0001 | 2.0900 | 0.0002 |
| JB-2-6                    | 18.355                                        | 0.013                                         | 15.587                                        | 0.010                                         | 38.363                                        | 0.024 | 0.8494 | 0.0001 | 2.0904 | 0.0002 |
| JB-2-7                    | 18.346                                        | 0.028                                         | 15.582                                        | 0.023                                         | 38.355                                        | 0.059 | 0.8494 | 0.0001 | 2.0907 | 0.0003 |
| JB-2-8                    | 18.335                                        | 0.021                                         | 15.571                                        | 0.017                                         | 38.326                                        | 0.043 | 0.8493 | 0.0001 | 2.0904 | 0.0002 |
| JB-2-9                    | 18.297                                        | 0.018                                         | 15.542                                        | 0.015                                         | 38.252                                        | 0.037 | 0.8494 | 0.0001 | 2.0906 | 0.0001 |
| JB-2-1                    | 18.298                                        | 0.013                                         | 15.546                                        | 0.011                                         | 38.297                                        | 0.028 | 0.8496 | 0.0001 | 2.0928 | 0.0002 |
| JB-2-2                    | 18.353                                        | 0.016                                         | 15.589                                        | 0.013                                         | 38.390                                        | 0.030 | 0.8494 | 0.0002 | 2.0916 | 0.0003 |
| JB-2-3                    | 18.360                                        | 0.025                                         | 15.595                                        | 0.021                                         | 38.415                                        | 0.052 | 0.8493 | 0.0001 | 2.0920 | 0.0003 |
| JB-2-4                    | 18.320                                        | 0.031                                         | 15.565                                        | 0.026                                         | 38.355                                        | 0.068 | 0.8496 | 0.0002 | 2.0927 | 0.0004 |
| JB-2-5                    | 18.333                                        | 0.021                                         | 15.573                                        | 0.017                                         | 38.353                                        | 0.045 | 0.8495 | 0.0001 | 2.0920 | 0.0001 |
| JB-2-6                    | 18.329                                        | 0.020                                         | 15.571                                        | 0.016                                         | 38.342                                        | 0.043 | 0.8495 | 0.0001 | 2.0919 | 0.0003 |
| JB-2-7                    | 18.298                                        | 0.011                                         | 15.543                                        | 0.010                                         | 38.272                                        | 0.023 | 0.8495 | 0.0001 | 2.0916 | 0.0003 |
| JB-2-8                    | 18.312                                        | 0.026                                         | 15.557                                        | 0.022                                         | 38.298                                        | 0.055 | 0.8495 | 0.0001 | 2.0915 | 0.0003 |
| JB-2-9                    | 18.342                                        | 0.029                                         | 15.579                                        | 0.024                                         | 38.355                                        | 0.060 | 0.8494 | 0.0001 | 2.0912 | 0.0002 |
| JB-2-10                   | 18.304                                        | 0.009                                         | 15.547                                        | 0.007                                         | 38.276                                        | 0.019 | 0.8494 | 0.0001 | 2.0911 | 0.0003 |
| JB-2-11                   | 18.322                                        | 0.014                                         | 15.568                                        | 0.012                                         | 38.352                                        | 0.030 | 0.8497 | 0.0001 | 2.0933 | 0.0003 |
| JB-2-12                   | 18.316                                        | 0.011                                         | 15.559                                        | 0.008                                         | 38.318                                        | 0.022 | 0.8495 | 0.0001 | 2.0921 | 0.0004 |
| JB-2-13                   | 18.303                                        | 0.015                                         | 15.547                                        | 0.013                                         | 38.281                                        | 0.029 | 0.8493 | 0.0001 | 2.0908 | 0.0002 |
| JB-2-14                   | 18.284                                        | 0.019                                         | 15.530                                        | 0.015                                         | 38.234                                        | 0.038 | 0.8494 | 0.0001 | 2.0911 | 0.0004 |
| JB-2-15                   | 18.300                                        | 0.015                                         | 15.545                                        | 0.012                                         | 38.276                                        | 0.031 | 0.8495 | 0.0001 | 2.0917 | 0.0002 |
| JB-2-1                    | 18.374                                        | 0.022                                         | 15.612                                        | 0.018                                         | 38.425                                        | 0.046 | 0.8497 | 0.0001 | 2.0913 | 0.0003 |
| JB-2-2                    | 18.320                                        | 0.018                                         | 15.557                                        | 0.013                                         | 38.308                                        | 0.040 | 0.8495 | 0.0001 | 2.0911 | 0.0003 |

Note: errors are given as 2 standard errors (2SE) apart from 2 standard deviations (2SD) for Average\* values. Solution ICP-MS/TIMS values are from our own analytical results and compilation of the previous reports.

Supplementary Table S1. Continue

| Sample                    | <sup>206</sup> Pb/ <sup>204</sup> Pb Error (2SE) | <sup>207</sup> Pb/ <sup>204</sup> Pb Error (2SE) | <sup>208</sup> Pb/ <sup>204</sup> Pb Error (2SE) | <sup>207</sup> Pb/ <sup>206</sup> Pb Error (2SE) | <sup>208</sup> Pb/ <sup>206</sup> Pb Error (2SE) |       |        |        |        |        |
|---------------------------|--------------------------------------------------|--------------------------------------------------|--------------------------------------------------|--------------------------------------------------|--------------------------------------------------|-------|--------|--------|--------|--------|
| [LA-MC-ICP-MS]            |                                                  |                                                  |                                                  |                                                  |                                                  |       |        |        |        |        |
| JB-2-3                    | 18.326                                           | 0.026                                            | 15.569                                           | 0.021                                            | 38.326                                           | 0.052 | 0.8495 | 0.0001 | 2.0912 | 0.0003 |
| JB-2-4                    | 18.300                                           | 0.013                                            | 15.542                                           | 0.010                                            | 38.261                                           | 0.025 | 0.8494 | 0.0001 | 2.0911 | 0.0002 |
| JB-2-5                    | 18.320                                           | 0.022                                            | 15.564                                           | 0.019                                            | 38.315                                           | 0.047 | 0.8496 | 0.0001 | 2.0915 | 0.0003 |
| JB-2-6                    | 18.291                                           | 0.011                                            | 15.538                                           | 0.009                                            | 38.248                                           | 0.022 | 0.8494 | 0.0001 | 2.0911 | 0.0002 |
| JB-2-7                    | 18.339                                           | 0.017                                            | 15.579                                           | 0.015                                            | 38.346                                           | 0.036 | 0.8495 | 0.0001 | 2.0910 | 0.0001 |
| JB-2-8                    | 18.316                                           | 0.011                                            | 15.555                                           | 0.010                                            | 38.292                                           | 0.024 | 0.8494 | 0.0001 | 2.0911 | 0.0001 |
| JB-2-9                    | 18.307                                           | 0.028                                            | 15.550                                           | 0.023                                            | 38.284                                           | 0.059 | 0.8494 | 0.0001 | 2.0913 | 0.0004 |
| JB-2-10                   | 18.309                                           | 0.015                                            | 15.550                                           | 0.013                                            | 38.289                                           | 0.029 | 0.8495 | 0.0001 | 2.0914 | 0.0001 |
| Average*                  | 18.319                                           | 0.046                                            | 15.561                                           | 0.038                                            | 38.312                                           | 0.103 | 0.8495 | 0.0018 | 2.0913 | 0.0002 |
| [Solution MC-ICP-MS/TIMS] |                                                  |                                                  |                                                  |                                                  |                                                  |       |        |        |        |        |
| JA-1                      | 18.304                                           | 0.013                                            | 15.538                                           | 0.016                                            | 38.256                                           | 0.048 | 0.849  | 0.0003 | 2.090  | 0.0016 |
| [LA-MC-ICP-MS]            |                                                  |                                                  |                                                  |                                                  |                                                  |       |        |        |        |        |
| JA-1-1                    | 18.363                                           | 0.020                                            | 15.589                                           | 0.017                                            | 38.379                                           | 0.042 | 0.8489 | 0.0001 | 2.0900 | 0.0002 |
| JA-1-2                    | 18.364                                           | 0.029                                            | 15.585                                           | 0.027                                            | 38.375                                           | 0.065 | 0.8490 | 0.0001 | 2.0905 | 0.0002 |
| JA-1-3                    | 18.269                                           | 0.026                                            | 15.505                                           | 0.022                                            | 38.176                                           | 0.055 | 0.8487 | 0.0001 | 2.0896 | 0.0002 |
| JA-1-4                    | 18.330                                           | 0.023                                            | 15.558                                           | 0.019                                            | 38.313                                           | 0.047 | 0.8488 | 0.0001 | 2.0901 | 0.0003 |
| JA-1-5                    | 18.321                                           | 0.017                                            | 15.550                                           | 0.014                                            | 38.282                                           | 0.034 | 0.8487 | 0.0001 | 2.0897 | 0.0002 |
| JA-1-1                    | 18.315                                           | 0.015                                            | 15.552                                           | 0.015                                            | 38.297                                           | 0.035 | 0.8489 | 0.0001 | 2.0904 | 0.0002 |
| JA-1-2                    | 18.333                                           | 0.012                                            | 15.563                                           | 0.010                                            | 38.327                                           | 0.025 | 0.8489 | 0.0001 | 2.0905 | 0.0002 |
| JA-1-3                    | 18.310                                           | 0.010                                            | 15.544                                           | 0.009                                            | 38.275                                           | 0.021 | 0.8489 | 0.0001 | 2.0904 | 0.0002 |
| JA-1-4                    | 18.289                                           | 0.018                                            | 15.528                                           | 0.015                                            | 38.232                                           | 0.039 | 0.8490 | 0.0001 | 2.0904 | 0.0002 |
| JA-1-5                    | 18.344                                           | 0.017                                            | 15.577                                           | 0.015                                            | 38.350                                           | 0.038 | 0.8492 | 0.0001 | 2.0905 | 0.0002 |
| JA-1-6                    | 18.284                                           | 0.013                                            | 15.524                                           | 0.011                                            | 38.233                                           | 0.026 | 0.8491 | 0.0001 | 2.0912 | 0.0002 |
| JA-1-7                    | 18.305                                           | 0.016                                            | 15.542                                           | 0.013                                            | 38.273                                           | 0.032 | 0.8489 | 0.0001 | 2.0904 | 0.0002 |
| JA-1-8                    | 18.307                                           | 0.012                                            | 15.547                                           | 0.011                                            | 38.270                                           | 0.027 | 0.8492 | 0.0001 | 2.0905 | 0.0002 |
| JA-1-9                    | 18.330                                           | 0.014                                            | 15.567                                           | 0.013                                            | 38.320                                           | 0.031 | 0.8491 | 0.0001 | 2.0902 | 0.0002 |
| JA-1-10                   | 18.314                                           | 0.014                                            | 15.554                                           | 0.012                                            | 38.289                                           | 0.029 | 0.8493 | 0.0001 | 2.0908 | 0.0002 |
| JA-1-1                    | 18.300                                           | 0.015                                            | 15.533                                           | 0.012                                            | 38.230                                           | 0.033 | 0.8487 | 0.0001 | 2.0892 | 0.0002 |
| JA-1-2                    | 18.297                                           | 0.015                                            | 15.529                                           | 0.012                                            | 38.232                                           | 0.030 | 0.8487 | 0.0001 | 2.0895 | 0.0002 |
| JA-1-3                    | 18.286                                           | 0.015                                            | 15.520                                           | 0.012                                            | 38.208                                           | 0.029 | 0.8487 | 0.0001 | 2.0894 | 0.0002 |
| JA-1-4                    | 18.282                                           | 0.014                                            | 15.519                                           | 0.012                                            | 38.211                                           | 0.028 | 0.8489 | 0.0001 | 2.0897 | 0.0002 |
| JA-1-5                    | 18.309                                           | 0.014                                            | 15.542                                           | 0.012                                            | 38.271                                           | 0.031 | 0.8489 | 0.0001 | 2.0903 | 0.0002 |
| JA-1-6                    | 18.289                                           | 0.016                                            | 15.525                                           | 0.013                                            | 38.219                                           | 0.032 | 0.8488 | 0.0001 | 2.0897 | 0.0002 |
| JA-1-7                    | 18.300                                           | 0.015                                            | 15.531                                           | 0.013                                            | 38.230                                           | 0.028 | 0.8487 | 0.0001 | 2.0894 | 0.0002 |
| JA-1-8                    | 18.305                                           | 0.013                                            | 15.538                                           | 0.011                                            | 38.256                                           | 0.028 | 0.8488 | 0.0001 | 2.0899 | 0.0002 |
| JA-1-9                    | 18.282                                           | 0.014                                            | 15.518                                           | 0.012                                            | 38.212                                           | 0.030 | 0.8488 | 0.0001 | 2.0900 | 0.0002 |
| JA-1-10                   | 18.296                                           | 0.013                                            | 15.533                                           | 0.011                                            | 38.247                                           | 0.027 | 0.8490 | 0.0001 | 2.0905 | 0.0002 |
| JA-1-S1                   | 18.261                                           | 0.034                                            | 15.494                                           | 0.030                                            | 38.152                                           | 0.075 | 0.8483 | 0.0002 | 2.0891 | 0.0005 |
| JA-1-S2                   | 18.317                                           | 0.040                                            | 15.542                                           | 0.033                                            | 38.290                                           | 0.089 | 0.8485 | 0.0002 | 2.0889 | 0.0004 |
| JA-1-S3                   | 18.302                                           | 0.029                                            | 15.525                                           | 0.023                                            | 38.236                                           | 0.057 | 0.8484 | 0.0002 | 2.0894 | 0.0003 |
| JA-1-S4                   | 18.286                                           | 0.040                                            | 15.520                                           | 0.034                                            | 38.220                                           | 0.085 | 0.8488 | 0.0002 | 2.0898 | 0.0006 |
| JA-1-S5                   | 18.264                                           | 0.089                                            | 15.511                                           | 0.075                                            | 38.193                                           | 0.183 | 0.8493 | 0.0003 | 2.0911 | 0.0008 |
| Average*                  | 18.305                                           | 0.051                                            | 15.539                                           | 0.045                                            | 38.260                                           | 0.111 | 0.8489 | 0.0011 | 2.0900 | 0.0005 |

Note: errors are given as 2 standard errors (2SE) apart from 2 standard deviations (2SD) for Average\* values. Solution ICP-MS/TIMS values are from our own analytical results and compilation of the previous reports.

Supplementary Table S2. Analytical results of bulk rock compositions of Pitcairn lavas using solution-MC-ICP-MS

| Sample               | $^{206}\text{Pb}/^{204}\text{Pb}$ Error (2SE) | $^{207}\text{Pb}/^{204}\text{Pb}$ Error (2SE) | $^{208}\text{Pb}/^{204}\text{Pb}$ Error (2SE) | $^{207}\text{Pb}/^{206}\text{Pb}$ Error (2SE) | $^{208}\text{Pb}/^{206}\text{Pb}$ Error (2SE) |
|----------------------|-----------------------------------------------|-----------------------------------------------|-----------------------------------------------|-----------------------------------------------|-----------------------------------------------|
| [Solution-MC-ICP-MS] |                                               |                                               |                                               |                                               |                                               |
| PC-2                 | 17.849                                        | 0.001                                         | 15.499                                        | 0.001                                         | 39.010                                        |
| PC-15                | 17.720                                        | 0.001                                         | 15.494                                        | 0.001                                         | 39.004                                        |
| PC-22                | 18.520                                        | 0.001                                         | 15.524                                        | 0.001                                         | 39.088                                        |
| PC-26                | 18.543                                        | 0.001                                         | 15.522                                        | 0.001                                         | 39.083                                        |
| PC-31                | 18.471                                        | 0.001                                         | 15.516                                        | 0.001                                         | 39.079                                        |
| PC-33                | 17.654                                        | 0.001                                         | 15.486                                        | 0.001                                         | 39.033                                        |
| PC-38                | 17.777                                        | 0.001                                         | 15.499                                        | 0.001                                         | 39.059                                        |
| PC-40                | 17.849                                        | 0.001                                         | 15.498                                        | 0.001                                         | 39.009                                        |
| PC-41                | 17.849                                        | 0.001                                         | 15.499                                        | 0.001                                         | 39.012                                        |
| PC-46                | 17.802                                        | 0.001                                         | 15.498                                        | 0.001                                         | 38.970                                        |
| PC-48                | 18.023                                        | 0.001                                         | 15.510                                        | 0.001                                         | 39.080                                        |
| PC-51                | 18.023                                        | 0.001                                         | 15.507                                        | 0.001                                         | 39.068                                        |
| PC-55                | 17.803                                        | 0.001                                         | 15.517                                        | 0.001                                         | 39.130                                        |
| PC-73                | 18.542                                        | 0.001                                         | 15.523                                        | 0.001                                         | 39.086                                        |
| PC-86                | 17.748                                        | 0.001                                         | 15.495                                        | 0.001                                         | 39.005                                        |
| PC-87A               | 17.783                                        | 0.001                                         | 15.498                                        | 0.001                                         | 39.006                                        |
| PC-90                | 17.718                                        | 0.001                                         | 15.494                                        | 0.001                                         | 39.005                                        |

Note: errors are given as 2 standard errors (2SE)

Supplementary Table S3. Analytical results of groundmass compositions of Pitcairn lavas

| Sample         | <sup>206</sup> Pb/ <sup>204</sup> Pb | Error (2SE) | <sup>207</sup> Pb/ <sup>204</sup> Pb | Error (2SE) | <sup>208</sup> Pb/ <sup>204</sup> Pb | Error (2SE) | <sup>207</sup> Pb/ <sup>206</sup> Pb | Error (2SE) | <sup>208</sup> Pb/ <sup>206</sup> Pb | Error (2SE) |
|----------------|--------------------------------------|-------------|--------------------------------------|-------------|--------------------------------------|-------------|--------------------------------------|-------------|--------------------------------------|-------------|
| [LA-MC-ICP-MS] |                                      |             |                                      |             |                                      |             |                                      |             |                                      |             |
| PC-1           | 18.022                               | 0.056       | 15.488                               | 0.039       | 39.033                               | 0.098       | 0.8602                               | 0.0002      | 2.1676                               | 0.0005      |
| PC-2           | 17.846                               | 0.059       | 15.497                               | 0.052       | 39.009                               | 0.132       | 0.8684                               | 0.0006      | 2.1856                               | 0.0009      |
| PC-3           | 17.799                               | 0.058       | 15.529                               | 0.049       | 39.148                               | 0.124       | 0.8726                               | 0.0003      | 2.1997                               | 0.0005      |
| PC-4           | 17.648                               | 0.064       | 15.511                               | 0.056       | 39.082                               | 0.144       | 0.8788                               | 0.0003      | 2.2146                               | 0.0005      |
| PC-5           | 17.945                               | 0.048       | 15.560                               | 0.037       | 39.176                               | 0.093       | 0.8677                               | 0.0003      | 2.1847                               | 0.0006      |
| PC-6           | 17.847                               | 0.097       | 15.503                               | 0.087       | 39.014                               | 0.218       | 0.8685                               | 0.0003      | 2.1860                               | 0.0009      |
| PC-7           | 17.782                               | 0.036       | 15.510                               | 0.029       | 39.075                               | 0.080       | 0.8723                               | 0.0004      | 2.1974                               | 0.0010      |
| PC-8           | 18.027                               | 0.046       | 15.493                               | 0.037       | 38.927                               | 0.097       | 0.8595                               | 0.0003      | 2.1594                               | 0.0006      |
| PC-10          | 17.897                               | 0.060       | 15.576                               | 0.050       | 39.136                               | 0.126       | 0.8706                               | 0.0005      | 2.1888                               | 0.0009      |
| PC-12          | 17.882                               | 0.066       | 15.528                               | 0.056       | 39.080                               | 0.141       | 0.8683                               | 0.0003      | 2.1854                               | 0.0006      |
| PC-12-2        | 17.893                               | 0.068       | 15.540                               | 0.057       | 39.099                               | 0.141       | 0.8684                               | 0.0004      | 2.1854                               | 0.0006      |
| PC-13          | 17.827                               | 0.076       | 15.549                               | 0.064       | 39.130                               | 0.170       | 0.8719                               | 0.0004      | 2.1947                               | 0.0008      |
| PC-14          | 17.665                               | 0.051       | 15.393                               | 0.037       | 38.747                               | 0.095       | 0.8710                               | 0.0004      | 2.1922                               | 0.0009      |
| PC-16          | 17.748                               | 0.034       | 15.465                               | 0.029       | 38.927                               | 0.073       | 0.8715                               | 0.0003      | 2.1935                               | 0.0005      |
| PC-17          | 18.536                               | 0.099       | 15.554                               | 0.085       | 39.145                               | 0.219       | 0.8394                               | 0.0006      | 2.1119                               | 0.0011      |
| PC-19          | 18.503                               | 0.058       | 15.535                               | 0.045       | 39.084                               | 0.120       | 0.8389                               | 0.0004      | 2.1121                               | 0.0007      |
| PC-21          | 18.559                               | 0.158       | 15.572                               | 0.136       | 39.227                               | 0.339       | 0.8391                               | 0.0006      | 2.1134                               | 0.0011      |
| PC-23          | 18.478                               | 0.093       | 15.562                               | 0.078       | 39.232                               | 0.199       | 0.8422                               | 0.0003      | 2.1233                               | 0.0009      |
| PC-25          | 18.392                               | 0.036       | 15.494                               | 0.030       | 39.013                               | 0.077       | 0.8424                               | 0.0002      | 2.1212                               | 0.0003      |
| PC-26          | 18.460                               | 0.113       | 15.435                               | 0.077       | 38.879                               | 0.207       | 0.8377                               | 0.0005      | 2.1100                               | 0.0009      |
| PC-29          | 18.449                               | 0.047       | 15.509                               | 0.040       | 39.044                               | 0.105       | 0.8406                               | 0.0003      | 2.1166                               | 0.0007      |
| PC-42-1        | 17.711                               | 0.023       | 15.541                               | 0.046       | 39.174                               | 0.114       | 0.8784                               | 0.0022      | 2.2138                               | 0.0055      |
| PC-42-2        | 17.643                               | 0.036       | 15.545                               | 0.034       | 39.237                               | 0.091       | 0.8817                               | 0.0007      | 2.2257                               | 0.0019      |
| PC-44          | 17.959                               | 0.040       | 15.546                               | 0.036       | 39.135                               | 0.094       | 0.8653                               | 0.0010      | 2.1787                               | 0.0029      |
| PC-45          | 17.634                               | 0.057       | 15.483                               | 0.055       | 39.055                               | 0.135       | 0.8781                               | 0.0008      | 2.2145                               | 0.0022      |
| PC-46-1        | 17.773                               | 0.037       | 15.280                               | 0.045       | 38.369                               | 0.123       | 0.8613                               | 0.0018      | 2.1632                               | 0.0051      |
| PC-46-2        | 17.787                               | 0.044       | 15.480                               | 0.041       | 38.939                               | 0.101       | 0.8705                               | 0.0003      | 2.1895                               | 0.0005      |
| PC-47          | 17.779                               | 0.038       | 15.508                               | 0.031       | 39.092                               | 0.077       | 0.8729                               | 0.0008      | 2.2018                               | 0.0020      |
| PC-49          | 18.097                               | 0.032       | 15.481                               | 0.037       | 38.950                               | 0.096       | 0.8567                               | 0.0009      | 2.1571                               | 0.0022      |
| PC-50          | 17.829                               | 0.029       | 15.521                               | 0.036       | 39.092                               | 0.088       | 0.8705                               | 0.0014      | 2.1924                               | 0.0038      |
| PC-52          | 18.039                               | 0.055       | 15.489                               | 0.052       | 39.068                               | 0.134       | 0.8590                               | 0.0010      | 2.1659                               | 0.0027      |
| PC-53          | 18.026                               | 0.034       | 15.506                               | 0.043       | 39.039                               | 0.105       | 0.8610                               | 0.0013      | 2.1677                               | 0.0029      |
| PC-54-1        | 18.500                               | 0.066       | 15.517                               | 0.072       | 39.120                               | 0.186       | 0.8391                               | 0.0014      | 2.1155                               | 0.0038      |
| PC-54-2        | 18.057                               | 0.036       | 15.564                               | 0.085       | 39.207                               | 0.191       | 0.8628                               | 0.0036      | 2.1729                               | 0.0076      |
| PC-55          | 17.819                               | 0.027       | 15.451                               | 0.032       | 38.918                               | 0.076       | 0.8671                               | 0.0010      | 2.1852                               | 0.0025      |
| PC-57-2        | 18.055                               | 0.051       | 15.532                               | 0.042       | 39.139                               | 0.111       | 0.8602                               | 0.0002      | 2.1677                               | 0.0006      |
| PC-57-3        | 18.078                               | 0.029       | 15.555                               | 0.025       | 39.179                               | 0.059       | 0.8604                               | 0.0003      | 2.1672                               | 0.0005      |
| PC-58          | 18.001                               | 0.025       | 15.486                               | 0.021       | 39.015                               | 0.054       | 0.8603                               | 0.0002      | 2.1674                               | 0.0004      |
| PC-59          | 18.465                               | 0.027       | 15.542                               | 0.025       | 39.188                               | 0.056       | 0.8420                               | 0.0002      | 2.1222                               | 0.0004      |
| PC-61          | 18.736                               | 0.079       | 15.660                               | 0.063       | 39.380                               | 0.161       | 0.8358                               | 0.0010      | 2.1036                               | 0.0027      |
| PC-62          | 18.476                               | 0.070       | 15.462                               | 0.058       | 38.959                               | 0.146       | 0.8370                               | 0.0004      | 2.1083                               | 0.0009      |
| PC-63          | 18.150                               | 0.023       | 15.562                               | 0.022       | 39.206                               | 0.052       | 0.8574                               | 0.0002      | 2.1601                               | 0.0003      |
| PC-64          | 18.479                               | 0.062       | 15.566                               | 0.052       | 39.198                               | 0.133       | 0.8424                               | 0.0003      | 2.1212                               | 0.0004      |
| PC-77          | 18.553                               | 0.021       | 15.532                               | 0.018       | 39.106                               | 0.043       | 0.8371                               | 0.0001      | 2.1077                               | 0.0002      |
| PC-78          | 18.554                               | 0.015       | 15.532                               | 0.012       | 39.117                               | 0.033       | 0.8371                               | 0.0001      | 2.1082                               | 0.0002      |
| PC-79          | 17.773                               | 0.004       | 15.497                               | 0.004       | 39.074                               | 0.008       | 0.8719                               | 0.0001      | 2.1985                               | 0.0001      |
| PC-80          | 17.799                               | 0.009       | 15.492                               | 0.008       | 39.061                               | 0.017       | 0.8704                               | 0.0001      | 2.1945                               | 0.0003      |
| PC-81          | 18.559                               | 0.031       | 15.539                               | 0.026       | 39.128                               | 0.067       | 0.8373                               | 0.0002      | 2.1082                               | 0.0002      |
| PC-82          | 18.315                               | 0.018       | 15.518                               | 0.013       | 39.095                               | 0.036       | 0.8471                               | 0.0001      | 2.1341                               | 0.0003      |
| PC-85          | 17.646                               | 0.016       | 15.482                               | 0.013       | 39.061                               | 0.034       | 0.8774                               | 0.0001      | 2.2136                               | 0.0002      |
| PC-86          | 17.735                               | 0.011       | 15.490                               | 0.009       | 38.997                               | 0.024       | 0.8734                               | 0.0001      | 2.1988                               | 0.0002      |
| PC-87-1        | 17.773                               | 0.013       | 15.491                               | 0.011       | 38.991                               | 0.027       | 0.8716                               | 0.0001      | 2.1939                               | 0.0002      |
| PC-87-2        | 17.777                               | 0.015       | 15.493                               | 0.012       | 38.993                               | 0.030       | 0.8715                               | 0.0001      | 2.1935                               | 0.0003      |
| PC-88          | 17.778                               | 0.015       | 15.488                               | 0.013       | 39.026                               | 0.033       | 0.8712                               | 0.0001      | 2.1952                               | 0.0002      |

Note: errors are given as 2 standard errors (2SE)

Supplementary Table S4. Analytical results of olivine melt inclusion compositions from Pitcairn lavas

| Sample         | $^{206}\text{Pb}/^{204}\text{Pb}$ Error (2SE) | $^{207}\text{Pb}/^{204}\text{Pb}$ Error (2SE) | $^{208}\text{Pb}/^{204}\text{Pb}$ Error (2SE) | $^{207}\text{Pb}/^{206}\text{Pb}$ Error (2SE) | $^{208}\text{Pb}/^{206}\text{Pb}$ Error (2SE) |       |        |        |        |        |
|----------------|-----------------------------------------------|-----------------------------------------------|-----------------------------------------------|-----------------------------------------------|-----------------------------------------------|-------|--------|--------|--------|--------|
| [LA-MC-ICP-MS] |                                               |                                               |                                               |                                               |                                               |       |        |        |        |        |
| PC38-1         | 17.918                                        | 0.017                                         | 15.457                                        | 0.019                                         | 38.884                                        | 0.060 | 0.8627 | 0.0003 | 2.1702 | 0.0014 |
| PC38-2         | 17.885                                        | 0.069                                         | 15.504                                        | 0.060                                         | 39.043                                        | 0.153 | 0.8669 | 0.0002 | 2.1830 | 0.0006 |
| PC38-3         | 17.308                                        | 0.311                                         | 15.099                                        | 0.255                                         | 38.070                                        | 0.669 | 0.8725 | 0.0011 | 2.1996 | 0.0018 |
| PC38-7         | 17.697                                        | 0.056                                         | 15.426                                        | 0.050                                         | 38.858                                        | 0.127 | 0.8717 | 0.0003 | 2.1958 | 0.0006 |
| PC38-8         | 17.696                                        | 0.089                                         | 15.436                                        | 0.074                                         | 38.878                                        | 0.196 | 0.8723 | 0.0005 | 2.1970 | 0.0010 |
| PC38-9         | 17.726                                        | 0.100                                         | 15.448                                        | 0.085                                         | 38.906                                        | 0.214 | 0.8715 | 0.0004 | 2.1949 | 0.0009 |
| PC38-11        | 17.449                                        | 0.200                                         | 15.203                                        | 0.174                                         | 38.291                                        | 0.442 | 0.8713 | 0.0009 | 2.1946 | 0.0020 |
| PC38-12        | 17.793                                        | 0.181                                         | 15.497                                        | 0.156                                         | 39.048                                        | 0.400 | 0.8710 | 0.0007 | 2.1947 | 0.0015 |
| PC38-13        | 17.784                                        | 0.080                                         | 15.496                                        | 0.069                                         | 39.038                                        | 0.175 | 0.8714 | 0.0004 | 2.1953 | 0.0011 |
| PC38-16        | 18.366                                        | 0.350                                         | 15.888                                        | 0.292                                         | 39.879                                        | 0.740 | 0.8651 | 0.0019 | 2.1715 | 0.0037 |
| PC38-16-2      | 17.211                                        | 0.160                                         | 15.005                                        | 0.133                                         | 37.751                                        | 0.323 | 0.8719 | 0.0015 | 2.1936 | 0.0048 |
| PC38-17        | 17.696                                        | 0.128                                         | 15.416                                        | 0.113                                         | 38.810                                        | 0.295 | 0.8712 | 0.0006 | 2.1932 | 0.0025 |
| PC38-19        | 18.251                                        | 0.056                                         | 15.486                                        | 0.047                                         | 38.953                                        | 0.120 | 0.8485 | 0.0004 | 2.1342 | 0.0007 |
| PC38-20-1      | 17.607                                        | 0.212                                         | 15.369                                        | 0.211                                         | 38.694                                        | 0.517 | 0.8730 | 0.0033 | 2.1978 | 0.0027 |
| PC38-20-2      | 17.683                                        | 0.085                                         | 15.424                                        | 0.076                                         | 38.864                                        | 0.190 | 0.8723 | 0.0006 | 2.1977 | 0.0011 |
| PC38-21        | 17.666                                        | 0.050                                         | 15.518                                        | 0.041                                         | 39.106                                        | 0.107 | 0.8785 | 0.0003 | 2.2138 | 0.0007 |
| PC38-22        | 17.678                                        | 0.119                                         | 15.428                                        | 0.105                                         | 38.817                                        | 0.268 | 0.8727 | 0.0005 | 2.1957 | 0.0012 |
| PC38-23        | 17.680                                        | 0.080                                         | 15.418                                        | 0.089                                         | 38.761                                        | 0.183 | 0.8721 | 0.0013 | 2.1924 | 0.0062 |
| PC38-24-1      | 17.777                                        | 0.169                                         | 15.492                                        | 0.143                                         | 39.025                                        | 0.381 | 0.8716 | 0.0008 | 2.1953 | 0.0020 |
| PC38-24-2      | 17.735                                        | 0.103                                         | 15.458                                        | 0.088                                         | 38.928                                        | 0.242 | 0.8717 | 0.0009 | 2.1950 | 0.0024 |
| PC38-25        | 17.560                                        | 0.054                                         | 15.456                                        | 0.047                                         | 38.952                                        | 0.122 | 0.8803 | 0.0003 | 2.2184 | 0.0005 |
| PC38-26        | 17.851                                        | 0.052                                         | 15.539                                        | 0.048                                         | 39.142                                        | 0.121 | 0.8704 | 0.0004 | 2.1926 | 0.0010 |
| PC38-42        | 17.859                                        | 0.139                                         | 15.555                                        | 0.124                                         | 39.206                                        | 0.305 | 0.8710 | 0.0008 | 2.1954 | 0.0015 |
| PC38-43        | 17.727                                        | 0.169                                         | 15.456                                        | 0.152                                         | 38.923                                        | 0.385 | 0.8719 | 0.0009 | 2.1957 | 0.0022 |
| PC38-44        | 17.703                                        | 0.076                                         | 15.429                                        | 0.066                                         | 38.860                                        | 0.162 | 0.8715 | 0.0007 | 2.1951 | 0.0029 |
| PC38-45        | 17.829                                        | 0.090                                         | 15.603                                        | 0.070                                         | 39.301                                        | 0.185 | 0.8752 | 0.0015 | 2.2044 | 0.0021 |
| PC38-48        | 17.793                                        | 0.064                                         | 15.514                                        | 0.052                                         | 39.094                                        | 0.247 | 0.8719 | 0.0014 | 2.1971 | 0.0066 |
| PC38-49-1      | 17.337                                        | 0.096                                         | 15.116                                        | 0.084                                         | 38.036                                        | 0.210 | 0.8719 | 0.0029 | 2.1939 | 0.0039 |
| PC38-49-2      | 17.699                                        | 0.077                                         | 15.417                                        | 0.065                                         | 38.852                                        | 0.160 | 0.8711 | 0.0005 | 2.1953 | 0.0010 |
| PC38-49-3      | 17.674                                        | 0.195                                         | 15.389                                        | 0.186                                         | 38.805                                        | 0.430 | 0.8707 | 0.0014 | 2.1956 | 0.0035 |
| PC38-49-4      | 17.829                                        | 0.107                                         | 15.555                                        | 0.131                                         | 39.181                                        | 0.262 | 0.8725 | 0.002  | 2.1977 | 0.0013 |
| PC38-49-5      | 17.793                                        | 0.151                                         | 15.515                                        | 0.136                                         | 39.067                                        | 0.333 | 0.8720 | 0.0013 | 2.1957 | 0.0021 |
| PC38-50        | 17.764                                        | 0.075                                         | 15.485                                        | 0.065                                         | 39.005                                        | 0.163 | 0.8717 | 0.0004 | 2.1958 | 0.0009 |
| PC40-1         | 17.720                                        | 0.155                                         | 15.404                                        | 0.136                                         | 38.796                                        | 0.338 | 0.8693 | 0.0012 | 2.1894 | 0.0014 |
| PC40-2         | 17.678                                        | 0.241                                         | 15.367                                        | 0.210                                         | 38.728                                        | 0.524 | 0.8693 | 0.0003 | 2.1908 | 0.0018 |
| PC40-3-2       | 17.672                                        | 0.095                                         | 15.365                                        | 0.086                                         | 38.700                                        | 0.222 | 0.8695 | 0.0004 | 2.1902 | 0.0011 |
| PC40-3-3       | 17.807                                        | 0.066                                         | 15.489                                        | 0.059                                         | 38.993                                        | 0.145 | 0.8699 | 0.0003 | 2.1900 | 0.0006 |
| PC40-7-1       | 18.270                                        | 0.138                                         | 15.636                                        | 0.115                                         | 39.169                                        | 0.308 | 0.8558 | 0.0005 | 2.1438 | 0.0012 |
| PC40-7-2       | 17.756                                        | 0.337                                         | 15.374                                        | 0.288                                         | 38.745                                        | 0.741 | 0.8659 | 0.0009 | 2.1820 | 0.0015 |
| PC40-8         | 17.968                                        | 0.248                                         | 15.632                                        | 0.217                                         | 39.343                                        | 0.555 | 0.8700 | 0.0006 | 2.1896 | 0.0014 |
| PC40-9         | 17.781                                        | 0.020                                         | 15.472                                        | 0.015                                         | 38.984                                        | 0.037 | 0.8701 | 0.0002 | 2.1925 | 0.0007 |
| PC40-11        | 17.643                                        | 0.188                                         | 15.355                                        | 0.164                                         | 38.669                                        | 0.368 | 0.8703 | 0.0004 | 2.1919 | 0.0030 |
| PC40-13        | 17.746                                        | 0.191                                         | 15.408                                        | 0.162                                         | 38.809                                        | 0.394 | 0.8682 | 0.0007 | 2.1871 | 0.0019 |
| PC40-15        | 17.616                                        | 0.369                                         | 15.282                                        | 0.309                                         | 38.479                                        | 0.772 | 0.8675 | 0.0011 | 2.1844 | 0.0024 |
| PC40-17-1      | 17.791                                        | 0.026                                         | 15.445                                        | 0.023                                         | 38.865                                        | 0.058 | 0.8681 | 0.0002 | 2.1845 | 0.0005 |
| PC40-17-2      | 17.947                                        | 0.086                                         | 15.502                                        | 0.070                                         | 38.941                                        | 0.182 | 0.8637 | 0.0006 | 2.1698 | 0.0012 |
| PC40-17-3      | 17.695                                        | 0.141                                         | 15.359                                        | 0.117                                         | 38.671                                        | 0.306 | 0.8679 | 0.0010 | 2.1854 | 0.0023 |
| PC40-20        | 17.719                                        | 0.129                                         | 15.382                                        | 0.107                                         | 38.712                                        | 0.279 | 0.8681 | 0.0010 | 2.1848 | 0.0033 |
| PC40-21        | 17.954                                        | 0.215                                         | 15.495                                        | 0.178                                         | 38.903                                        | 0.470 | 0.8630 | 0.0010 | 2.1668 | 0.0016 |
| PC40-25-1      | 17.607                                        | 0.014                                         | 15.433                                        | 0.010                                         | 38.927                                        | 0.017 | 0.8765 | 0.0002 | 2.2109 | 0.0009 |
| PC40-25-2      | 17.585                                        | 0.012                                         | 15.436                                        | 0.010                                         | 38.927                                        | 0.023 | 0.8778 | 0.0001 | 2.2137 | 0.0003 |
| PC40-27-1      | 17.990                                        | 0.275                                         | 15.535                                        | 0.246                                         | 38.948                                        | 0.625 | 0.8636 | 0.0011 | 2.1650 | 0.0043 |
| PC40-27-2      | 18.032                                        | 0.145                                         | 15.569                                        | 0.116                                         | 38.974                                        | 0.313 | 0.8634 | 0.0009 | 2.1614 | 0.0014 |
| PC40-29        | 17.839                                        | 0.029                                         | 15.464                                        | 0.026                                         | 38.928                                        | 0.065 | 0.8669 | 0.0003 | 2.1822 | 0.0009 |

Note: errors are given as 2 standard errors (2SE)

Supplementary Table S4. Continue

| Sample         | $^{206}\text{Pb}/^{204}\text{Pb}$ Error (2SE) | $^{207}\text{Pb}/^{204}\text{Pb}$ Error (2SE) | $^{208}\text{Pb}/^{204}\text{Pb}$ Error (2SE) | $^{207}\text{Pb}/^{206}\text{Pb}$ Error (2SE) | $^{208}\text{Pb}/^{206}\text{Pb}$ Error (2SE) |
|----------------|-----------------------------------------------|-----------------------------------------------|-----------------------------------------------|-----------------------------------------------|-----------------------------------------------|
| [LA-MC-ICP-MS] |                                               |                                               |                                               |                                               |                                               |
| PC40-35        | 17.685                                        | 0.263                                         | 15.359                                        | 0.234                                         | 38.667                                        |
| PC40-36        | 17.827                                        | 0.205                                         | 15.451                                        | 0.176                                         | 38.928                                        |
| PC40-37        | 17.743                                        | 0.060                                         | 15.390                                        | 0.049                                         | 38.754                                        |
| PC40-38        | 17.599                                        | 0.143                                         | 15.265                                        | 0.120                                         | 38.422                                        |
| PC86-1         | 17.478                                        | 0.049                                         | 15.286                                        | 0.049                                         | 38.452                                        |
| PC86-5         | 17.964                                        | 0.043                                         | 15.522                                        | 0.037                                         | 38.983                                        |
| PC86-13        | 17.780                                        | 0.028                                         | 15.526                                        | 0.024                                         | 39.076                                        |
| PC86-15-1      | 17.735                                        | 0.295                                         | 15.426                                        | 0.253                                         | 38.740                                        |
| PC86-15-2      | 17.751                                        | 0.024                                         | 15.500                                        | 0.022                                         | 39.005                                        |
| PC86-17        | 17.778                                        | 0.061                                         | 15.449                                        | 0.054                                         | 38.855                                        |
| PC86-19        | 17.760                                        | 0.015                                         | 15.507                                        | 0.013                                         | 39.034                                        |
| PC86-20        | 17.787                                        | 0.021                                         | 15.488                                        | 0.017                                         | 38.964                                        |
| PC87-3         | 17.866                                        | 0.483                                         | 15.564                                        | 0.420                                         | 39.133                                        |
| PC87-4         | 18.254                                        | 0.043                                         | 15.496                                        | 0.037                                         | 38.925                                        |

Note: errors are given as 2 standard errors (2SE)
